# Supplementary material for: The Only Chemoreceptor Encoded by che Operon Affects the Chemotactic Response of Agrobacterium to Various Chemoeffectors
Source: MDPI journal article supplement (doi:10.3390/microorganisms9091923), 2021-09-10
Supplement: s1 [file s1]

### A. Schematic diagram of gene replacement strategy (First cross occurs in upstream)

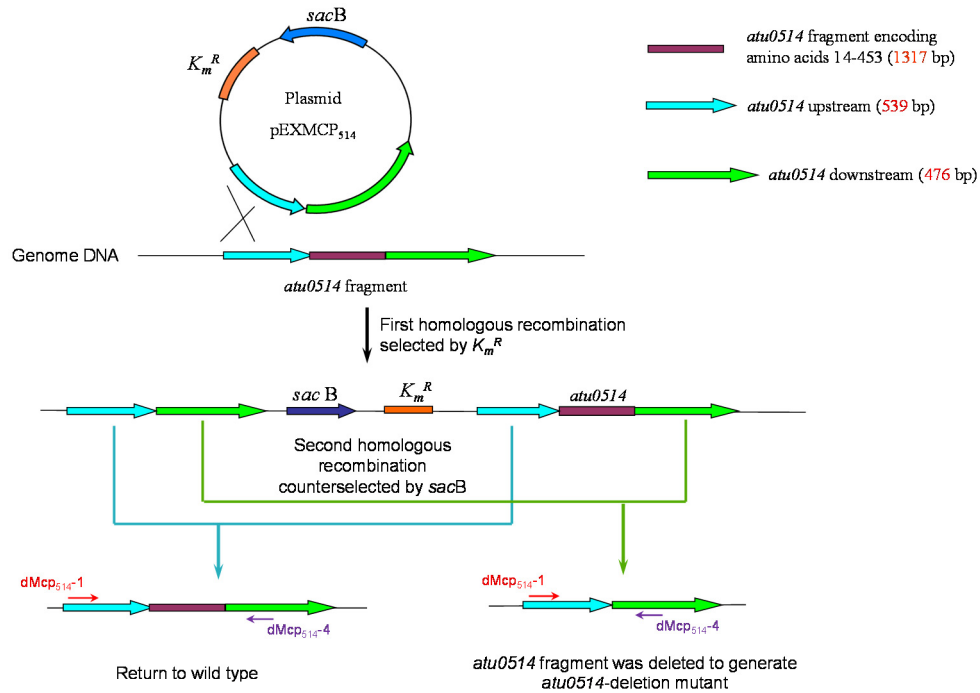

### B. Screening of *atu0514*-deletion mutant.

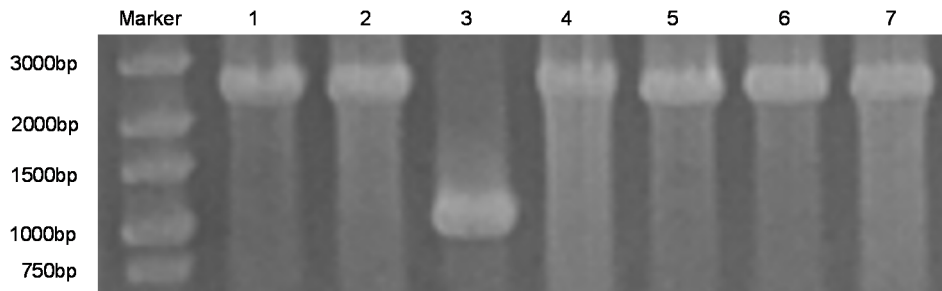

### C. Sequencing result of PCR fragment amplified from the mutant.

```

A514 1 CCGTTGATTGTTTTAGGGGAACCCGACGCGCTTGTCCAGCGCGCAGGCCGGAACCCGCGGAGCGTCGGATTCCCTTTTCGTTTTTCCCGCTTGC 100
C58 1 CCGTTGATTGTTTTAGGGGAACCCGACGCGCTTGTCCAGCGCGCAGGCCGGAACCCGCGGAGCGTCGGATTCCCTTTTCGTTTTTCCCGCTTGC 100

A514 101 GGCAAGTAAGGGCGACAATGGCTAAAAGCTTTTACAAATTTTACCGTTTGAGGCCGCTGCTTATGTTTCTTAACCTTCAAGCAAGGAATTAACCATAA 200
C58 101 GGCAAGTAAGGGCGACAATGGCTAAAAGCTTTTACAAATTTTACCGTTTGAGGCCGCTGCTTATGTTTCTTAACCTTCAAGCAAGGAATTAACCATAA 200

A514 201 GATTGGTGGTATTTCCACGGCGGAATGGGGTTCTCCCTCCCTCCAGGCATGACGCCGCACTGCCGTACCGGGCTCGATCCGGTATTTTCGTTTCTTGTTTC 300
C58 201 GATTGGTGGTATTTCCACGGCGGAATGGGGTTCTCCCTCCCTCCAGGCATGACGCCGCACTGCCGTACCGGGCTCGATCCGGTATTTTCGTTTCTTGTTTC 300

A514 301 AAGAAGGTCTGGCAAGCGTCGATGCCTCATCGTCCACGATGGGTATGTTGTTCAAAAATCCCTGGAGGGTGTGGCGTTTGAACCTTGGCCAATTGGC 400
C58 301 AAGAAGGTCTGGCAAGCGTCGATGCCTCATCGTCCACGATGGGTATGTTGTTCAAAAATCCCTGGAGGGTGTGGCGTTTGAACCTTGGCCAATTGGC 400

A514 401 CGGGTTTACCGGCCATCATGTTGTTGGGACGTCGGTTGGGGCAGCATTTGCCATCAGATCAAGCGCTAGATCGGCAGGCGGAAGCCTGGCAGGACGG 500
C58 401 CGGGTTTACCGGCCATCATGTTGTTGGGACGTCGGTTGGGGCAGCATTTGCCATCAGATCAAGCGCTAGATCGGCAGGCGGAAGCCTGGCAGGACGG 500

A514 501 TTGCGCTTTGCGGCGCTTGATGAGATGCAATCCGATTTTCTGCGCAATTATCGCGCATGCTGGAGCCTTACGTCAAGGCGGCGCTGCGCGACGTGATGA 600
C58 501 TTGCGCTTTGCGGCGCTTGATGAGATGCAATCCGATTTTCTGCGCAATTATCGCGCATGCTGGAGCCTTACGTCAAGGCGGCGCTGCGCGACGTGATGA 600

A514 540 -----SATGCGCTGCACACCGTCATTCTGGAACCTCGGCCGACCGCT 580
C58 1801 AACAGCAACGGCAGGCCGCGGAATGTCGCGCATGGGGCGCCAGCGCTCCGAGGCCSATGCGCTGCACACCGTCATTCTGGAACCTCGGCCGACCGCT 1900

A514 581 GCGCGCGTTCGTTATGCGCGCAGGAACATTTGCTGCGCGCGCGCTGCGGACTGGCAGCACTCATCATTATGGCCCGTGGGGATAACCGCACGGAT 680
C58 1901 GCGCGCGTTCGTTATGCGCGCAGGAACATTTGCTGCGCGCGCGCTGCGGACTGGCAGCACTCATCATTATGGCCCGTGGGGATAACCGCACGGAT 2000

A514 681 AACAGCCAGAATTACCAACAATTACAGCTCAGGGAGTCATGTAATGGCAGCCAGAAAAGCAGCTGAGGCGACGCTGAAACTGTACCGGTGCTGGATCT 780
C58 2001 AACAGCCAGAATTACCAACAATTACAGCTCAGGGAGTCATGTAATGGCAGCCAGAAAAGCAGCTGAGGCGACGCTGAAACTGTACCGGTGCTGGATCT 2100

A514 781 CAACGAAGCATCGGCTCTGCACGGCAAGCTGATGACGCTGAGAGGAGCACCTTTGTCGTCGATGCGTCCGAGGTGGAGCGCATTTGGCGCGCTTTGCGCC 880
C58 2101 CAACGAAGCATCGGCTCTGCACGGCAAGCTGATGACGCTGAGAGGAGCACCTTTGTCGTCGATGCGTCCGAGGTGGAGCGCATTTGGCGCGCTTTGCGCC 2200

A514 881 CAGGTCTCATGGCCGCGCGAAATCCTGGGAAGAGGATGGCAAGCCCTTCGTTTCGCAAGGGTTCCGATGCATTGCACAAGACCATGAAACTGATAG 980
C58 2201 CAGGTCTCATGGCCGCGCGAAATCCTGGGAAGAGGATGGCAAGCCCTTCGTTTCGCAAGGGTTCCGATGCATTGCACAAGACCATGAAACTGATAG 2300

A514 981 GCGTCGATATCGACCATTTGCTCCCTAAGGAGATG 1015
C58 2301 GCGTCGATATCGACCATTTGCTCCCTAAGGAGATG 2335

```

**Figure S1.** Construction procedure, screening and verification of *atu0514*-deficient mutants. **(A)** Schematic diagram of gene replacement strategy. The suicide plasmid pEXMCP<sub>514</sub> carrying the upstream (light blue arrow) and downstream (green arrow) sequences of *atu0514* was introduced to the recipient cell. Because this plasmid can not be replicated in *A. fabrum*, only the transformants that the plasmid was integrated into the genome DNA at the locus of the target gene by homologous recombination can grow under the selection pressure of kanamycin. The K<sub>m</sub><sup>R</sup> (orange rectangles) represents kanamycin-resistant gene. The *sacB* (blue arrows) is a counterselectable marker gene (sucrose suicide gene) that confers sucrose sensitivity. A fragment of *atu0514* was shown in dark red rectangles. Colonies having undergone single cross-over homologous recombination (×) were screened as kanamycin resistance and sucrose sensitivity. Second cross-over homologous recombination event was selected by plating the single cross-over colonies on media containing 5% sucrose. The *atu0514*-deletion (or replacement) mutants were isolated from the kanamycin-sensitive and sucrose-resistant colonies. **(B)** Screening of *atu0514*-deletion mutants. The *atu0514*-deletion mutants were screened by PCR. Two oligonucleotides, dMcp<sub>514</sub>-1 (annealed to upstream of *atu0514*) and dMcp<sub>514</sub>-4 (annealed to downstream of *atu0514*), were used as the primers. PCR fragment amplified from wild type template is longer than that from mutant template. After agarose gel electrophoresis, only the PCR product in lane 3 was amplified from the *atu0514*-deletion mutant template. **(C)** Sequencing result of the PCR fragment amplified from the mutant. The red border rectangles indicate the rest fragment of *atu0514* and the black dot indicate the nucleotide shared by *atu0514* and *atu0515*.

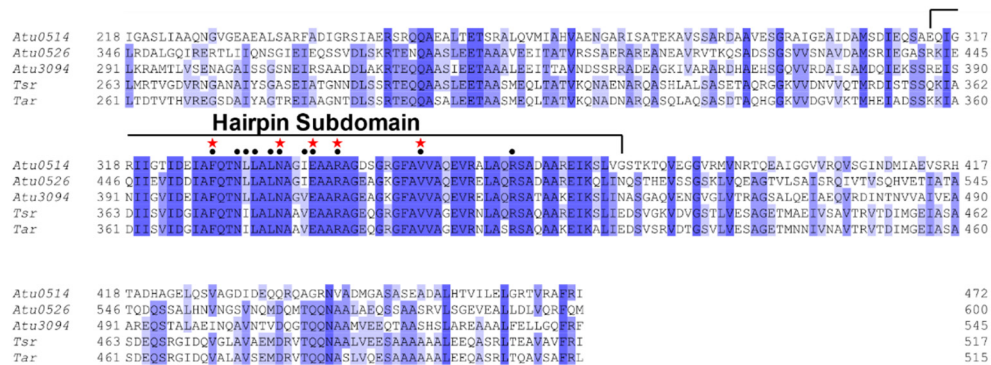

**Figure S2.** Sequences of three *A. fabrum* MCPs and two *E. coli* MCPs were aligned by Jalview. The numbers in two sides indicate the position of amino acid. The black dots represent the key residues of trimer contact in *E. coli* MCPs[52]. The red stars indicate the residues of the single residue substitution for MCP<sub>514</sub>.

**Table S1.** Bacterial strains and plasmids used in this study

| Bacterial strains                         | Relevant feature(s)                                                                                                                                                                                              | Reference/source               |
|-------------------------------------------|------------------------------------------------------------------------------------------------------------------------------------------------------------------------------------------------------------------|--------------------------------|
| <i>Escherichia coli</i>                   |                                                                                                                                                                                                                  |                                |
| E. coli DH5 $\alpha$                      | F <sup>-</sup> , $\phi$ 80dlacZ $\Delta$ M15, $\Delta$ (lacZYAargF)U169,deoR,recA1,endA1,hsdR17(rK <sup>-</sup> ,mK <sup>+</sup> ), phoA, supE44, $\lambda$ <sup>-</sup> , thi-1, gyrA96, relA1, for DNA cloning | Bethesda Research Laboratories |
| XL1 Blue                                  | Report strain for Bacterial Two-hybrid System                                                                                                                                                                    | Stratagene                     |
| <i>Agrobacterium fabrum</i>               |                                                                                                                                                                                                                  |                                |
| C58                                       | Nopaline type strain; pTiC58, pAtC58                                                                                                                                                                             | [63]                           |
| C58 $\Delta$ 514                          | C58 derivative deletional mutant in locus <i>atu0514</i>                                                                                                                                                         | This study                     |
| C58 $\Delta$ 514-C                        | C58 $\Delta$ mcp514 in which <i>cheW1</i> expression was restored by pCBMCP <sub>514</sub>                                                                                                                       | This study                     |
| C58 $\Delta$ w                            | C58 derivative deletional mutant in locus both <i>cheW1</i> and <i>cheW2</i>                                                                                                                                     | [40]                           |
| C58 $\Delta$ a                            | C58 derivative deletional mutant in locus <i>chea</i>                                                                                                                                                            | [40]                           |
| $\Delta$ 514 $\Delta$ w                   | C58 derivative triple-deletion mutant in locus <i>cheW1</i> , <i>cheW2</i> , and <i>atu0514</i>                                                                                                                  | This study                     |
| <b>Plasmid</b>                            |                                                                                                                                                                                                                  |                                |
| pEX18Km                                   | Derivative of pEX18Tc in which Tc <sup>r</sup> was replaced by <i>nptIII</i> from pCB301; Km <sup>R</sup> , Sur <sup>S</sup>                                                                                     | [38]                           |
| pEXMCP <sub>514</sub>                     | pEX18Km, carrying a 1015bp fragment, which consisted of 539bp upstream fragment (from -500 to +39) and 476bp downstream fragment (from +1359 to +1835) of <i>atu0514</i>                                         | This study                     |
| pUCA-19                                   | pUC19 carrying an agrobacterial replicon; Ap <sup>R</sup> , Cr <sup>R</sup>                                                                                                                                      | [38]                           |
| pUCA-GMCP <sub>514</sub>                  | pUCA-19, carrying an eGFP-MCP <sub>514</sub> expression cassette at HindIII and BamHI; Ap <sup>R</sup> , Cr <sup>R</sup>                                                                                         | This study                     |
| pUCA-GMCP <sub>514</sub> <sup>F328A</sup> | pUCA-19, carrying an eGFP-MCP <sub>514</sub> expression cassette with single residue-substitution F382A at HindIII and BamHI; Ap <sup>R</sup> , Cr <sup>R</sup>                                                  | This study                     |
| pUCA-GMCP <sub>514</sub> <sup>F328P</sup> | pUCA-19, carrying an eGFP-MCP <sub>514</sub> expression cassette with single residue-substitution F382P at HindIII and BamHI; Ap <sup>R</sup> , Cr <sup>R</sup>                                                  | This study                     |
| pUCA-GMCP <sub>514</sub> <sup>F328W</sup> | pUCA-19, carrying an eGFP-MCP <sub>514</sub> expression cassette with single residue-substitution F382W at HindIII and BamHI; Ap <sup>R</sup> , Cr <sup>R</sup>                                                  | This study                     |
| pCB301                                    | A minim binary vector plasmid, Km <sup>R</sup>                                                                                                                                                                   | [38]                           |
| pCBMCP <sub>514</sub>                     | pCB301, carrying a 2207bp MCP <sub>514</sub> expression cassette at BamHI and EcoRI, which consisted of 662bp upstream and 1545bp orf of <i>atu0514</i> ; Km <sup>R</sup>                                        | This study                     |
| pCBMCP <sub>514</sub> <sup>F328A</sup>    | pCB301, carrying a 2207bp MCP <sub>514</sub> expression cassette with single residue-substitution F382A; Km <sup>R</sup>                                                                                         | This study                     |
| pCBMCP <sub>514</sub> <sup>N336A</sup>    | pCB301, carrying a 2207bp MCP <sub>514</sub> expression cassette with single residue-substitution N336A; Km <sup>R</sup>                                                                                         | This study                     |
| pCBMCP <sub>514</sub> <sup>E340A</sup>    | pCB301, carrying a 2207bp MCP <sub>514</sub> expression cassette with single residue-substitution E340A; Km <sup>R</sup>                                                                                         | This study                     |
| pCBMCP <sub>514</sub> <sup>R343A</sup>    | pCB301, carrying a 2207bp MCP <sub>514</sub> expression cassette with single residue-substitution R343A; Km <sup>R</sup>                                                                                         | This study                     |
| pCBMCP <sub>514</sub> <sup>V353A</sup>    | pCB301, carrying a 2207bp MCP <sub>514</sub> expression cassette with single residue-substitution V353A; Km <sup>R</sup>                                                                                         | This study                     |
| pBT                                       | Bait plasmid, Cm <sup>R</sup>                                                                                                                                                                                    | Stratagene                     |
| pBT-MCP <sub>514</sub> MA                 | pBT, carrying <i>atu0514</i> orf at BamHI and XhoI, Cm <sup>R</sup>                                                                                                                                              | This study                     |
| pTRG                                      | Target plasmid, Tc <sup>R</sup>                                                                                                                                                                                  | Stratagene                     |
| pTRG-W <sub>1</sub>                       | pTRG, carrying <i>cheW1</i> orf at BamHI and XhoI, Tc <sup>R</sup>                                                                                                                                               | [40]                           |
| pTRG-W <sub>2</sub>                       | pTRG, carrying <i>cheW2</i> orf at BamHI and XhoI, Tc <sup>R</sup>                                                                                                                                               | [40]                           |

References

63. Thomashow, M.; Nutter, R.; Montoya, A.; Gordon, M.; Nester, E. Integration and organization of Ti plasmid sequences in crown gall tumors. *Cell* **1980**, *19*, 729-739, doi:10.1016/S0092-8674(80)80049-3.

**Table S2.** Primers used in this study

| Primers                    | Sequences                                  | Purpose                                                                                  |
|----------------------------|--------------------------------------------|------------------------------------------------------------------------------------------|
| dMCP <sub>514</sub> -1     | GACTCTAGAGGATCCCGTTGATTTGTTTTAGGGGAAC      | To amplify the upstream sequence of <i>atu0514</i> to construct pEXMCP <sub>514</sub>    |
| dMCP <sub>514</sub> -2     | GACGGTGTGCAGCGCATCGAAATCGGATTGCATCTCATCAAG |                                                                                          |
| dMCP <sub>514</sub> -3     | GAGATGCAATCCGATTTCGATGCGCTGCACACCGTCAT     | To amplify the downstream sequence of <i>atu0514</i> to construct pEXMCP <sub>514</sub>  |
| dMCP <sub>514</sub> -4     | TGCTGCCAACTCGAGCATCTCCTTAGGGAGCAAATGGT     |                                                                                          |
| egfp-MCP <sub>514</sub> -1 | GATTACGCCAAGCTTGATGGTGAGCAAGGGCGAGG        | To amplify the sequence of <i>egfp</i>                                                   |
| egfp-MCP <sub>514</sub> -2 | GCTGCCACCTCCACCCCTGTACAGCTCGTCCATGCC       |                                                                                          |
| egfp-MCP <sub>514</sub> -3 | GGTGGAGGTGGCAGCATGGGTATGTTTCGTTCAAAAATC    | To amplify the sequence of <i>atu0514</i> fusing to <i>egfp</i>                          |
| egfp-MCP <sub>514</sub> -4 | GGTACCCGGGGATCCTTACATGACTCCCTGACGTCTG      |                                                                                          |
| pCBMCP <sub>514</sub> -1   | AGAAGTAGTGGATCCCGAGGGTACCTGAAAGCCGAT       | To amplify the complement sequence of pCBMCP <sub>514</sub>                              |
| pCBMCP <sub>514</sub> -2   | CTTGATATCGAATTCCTTACATGACTCCCTGACGTCTG     |                                                                                          |
| F328A-1                    | GAGATCGCCGCCAGACCAACCTTCTCGCCCT            | To amplify the sequence of MCP <sub>514</sub> with the single residue-substitution F328A |
| F328A-2                    | GGTTGGTCTGGGCGGCGATCTCGTCGATGGTGC          |                                                                                          |
| F328P-1                    | GAGATCGCCCCCAGACCAACCTTCTCGCCCT            | To amplify the sequence of MCP <sub>514</sub> with the single residue-substitution F328P |
| F328P-2                    | GGTTGGTCTGGGGGGCGATCTCGTCGATGGTGC          |                                                                                          |
| F328W-1                    | GAGATCGCCTGGCAGACCAACCTTCTCGCCCT           | To amplify the sequence of MCP <sub>514</sub> with the single residue-substitution F328W |
| F328W-2                    | GGTTGGTCTGCCAGGCGATCTCGTCGATGGTGC          |                                                                                          |
| N336A-1                    | TCGCCCTCGCCGCCGGCATCGAGGCG                 | To amplify the sequence of MCP <sub>514</sub> with the single residue-substitution N336A |
| N336A-2                    | TGCCGGCGGCGAGGGCGAGAAGGTTGGTCT             |                                                                                          |
| E340A-1                    | CCGGCATCGCCGCGGCACGGGCCC                   | To amplify the sequence of MCP <sub>514</sub> with the single residue-substitution E340A |
| E340A-2                    | GTGCCGCGGCGATGCCGGCATTGAGGGCG              |                                                                                          |
| R343A-1                    | GGCGGCAGCCGCCGGCGACAGCGGA                  | To amplify the sequence of MCP <sub>514</sub> with the single residue-substitution R343A |
| R343A-2                    | CGCCGGCGGCTGCCGCCTCGATGCCG                 |                                                                                          |
| V353A-1                    | GGTTTCGCCGCCGTTGCGCAGGAAGTCCGGG            | To amplify the sequence of MCP <sub>514</sub> with the single residue-substitution V353A |
| V353A-2                    | TGCGCAACGGCGGCGAAACCGCGTCCG                |                                                                                          |
| MCP <sub>514</sub> MA-1    | GGCCGCATCGAATTCTCGCTGATAGCCGCCAG           | To amplify the sequence of MCP <sub>514</sub> cytoplasmic signal domain                  |
| MCP <sub>514</sub> MA-2    | TTAACTCGAGGATCCTTAGCGGGCAATACGGAACG        |                                                                                          |
